# Supplementary material
Source: PubMed Central journal article supplement (PMC5256607)
Supplement: 12248_2016_9889_MOESM6_ESM.pdf [file 12248_2016_9889_MOESM6_ESM.pdf]

| <b>Parameter</b>                                                                                                | <b>AZD7009</b>  |
|-----------------------------------------------------------------------------------------------------------------|-----------------|
| Molecular weight (Da)                                                                                           | 446.5           |
| logP                                                                                                            | 3               |
| K <sub>p</sub> factor used in simulations; rat / human                                                          | 1 / 0.7         |
| Base pKa                                                                                                        | 9.7             |
| Binding to plasma (% free); rat / human                                                                         | 65 / 34         |
| Solubility (μmol/L)                                                                                             | 449             |
| Caco-2 permeability in apical to basolateral direction,<br>pH6.5 to 7.4 (x10 <sup>-6</sup> cm/s)                | 1.9             |
| Caco-2 permeability in apical to basolateral direction with quinidine,<br>pH6.5 to 7.4 (x10 <sup>-6</sup> cm/s) | 5.8             |
| Permeability used in simulations (x10 <sup>-6</sup> cm/s); rat / human                                          | 5 / 5.8         |
| Liver microsomal CL <sub>int</sub> (mL/min/kg); rat / human                                                     | 85 / 8.2        |
| CL <sub>int</sub> used in simulations (mL/min/kg)                                                               | 441 / 60        |
| Human blood:plasma ratio                                                                                        | 1.23            |
| Human total plasma clearance (mL/min/kg)                                                                        | 16 ± 1.7        |
| Human renal clearance (mL/min/kg)                                                                               | 2.9 ± 0.3       |
| Human fraction of compound excreted unchanged in urine (%)                                                      | 17 ± 1          |
| F <sub>oral</sub> (%); rat / human                                                                              | 36 ± 7 / 16 ± 4 |
| Intestinal loss rate constants (min <sup>-1</sup> ); rat / human                                                | ND / 0.1        |
| Intestinal loss fractions from physiologically<br>based PK simulations (%); rat / human                         | ND / 0.55       |
