# Supplementary material
Source: PubMed Central journal article supplement (PMC5256607)
Supplement: 12248_2016_9889_MOESM7_ESM.pdf [file 12248_2016_9889_MOESM7_ESM.pdf]

| Mode of drug administration                                | Mean fraction of metabolite | Mean fraction of parent drug | M/P ratio |
|------------------------------------------------------------|-----------------------------|------------------------------|-----------|
| Intravenous (from AUC determination)                       | 0.87                        | 0.13                         | 6.7       |
| Oral (from AUC determination)                              | 0.983                       | 0.017                        | 57        |
| Oral (expected assuming there is no intestinal metabolism) |                             |                              |           |
| after first pass                                           | 0.55                        | 0.45                         |           |
| during systemic circulation                                | 0.39 (0.45 × 0.87)          | 0.06 (0.45 × 0.13)           |           |
| total                                                      | 0.94 (0.39 + 0.55)          | 0.06                         | 16        |

**AUC** = area under the plasma concentration-time curve.
